# Supplementary material for: Seroprevalence of Antibodies to SARS-CoV-2 in Guangdong Province, China between March to June 2020
Source: MDPI journal article supplement (doi:10.3390/pathogens10111505), 2021-11-18
Supplement: s1 [file s1]

**Supplemental Table S1:** Timeline and details of the public health response implemented after the emergence of COVID-19 in Guangdong.

| Level of Emergency <sup>a</sup>     |                                                                     | I                                                                                 | II                                                                                                                      | III                                                                                                                           |
|-------------------------------------|---------------------------------------------------------------------|-----------------------------------------------------------------------------------|-------------------------------------------------------------------------------------------------------------------------|-------------------------------------------------------------------------------------------------------------------------------|
| Level of Response and authorization |                                                                     | Extremely serious public health emergency. Coordinated at the State Council level | Serious public health emergency. Coordinated at the provincial level with guidance from the State Council (if required) | Public health emergency. Coordinated at the municipal level with guidance from the Provincial Health Commission (if required) |
| Period                              |                                                                     | January 23 to February 24, 2020                                                   | February 25 to May 8, 2020                                                                                              | May 9th to Present                                                                                                            |
| <i>Risk-based measures</i>          | Screening and isolation of fever cases                              | Yes                                                                               | Yes                                                                                                                     | Yes                                                                                                                           |
|                                     | Screening and isolation of residents in high risks communities      | Yes                                                                               | Yes                                                                                                                     | Yes                                                                                                                           |
|                                     | Mandatory quarantine of close contacts and international travellers | Yes                                                                               | Yes                                                                                                                     | Yes                                                                                                                           |
| <i>Community-wide measures</i>      | Limited interprovincial/international travel                        | Yes                                                                               | Yes                                                                                                                     | Yes                                                                                                                           |
|                                     | Closure of schools, and businesses                                  | Yes                                                                               | Schools remained closed                                                                                                 | Schools reopened in June                                                                                                      |
|                                     | Closure of public spaces                                            | Yes                                                                               | Gradual reopening of public spaces                                                                                      | Gradual reopening of public spaces                                                                                            |
|                                     | Banning of public gatherings                                        | Yes                                                                               | Gradual easing of ban                                                                                                   | No                                                                                                                            |
|                                     | Banning of dine-in                                                  | Yes                                                                               | Banned in high risks areas                                                                                              | No                                                                                                                            |
|                                     | Mandatory masks in public areas                                     | Yes                                                                               | Yes                                                                                                                     | Yes                                                                                                                           |
|                                     | Access restriction to private spaces                                | Yes                                                                               | Yes                                                                                                                     | No                                                                                                                            |
|                                     | Social distancing required                                          | Yes                                                                               | Recommended                                                                                                             | No                                                                                                                            |
|                                     | Temperature-scanning                                                | Yes                                                                               | Yes                                                                                                                     | Yes                                                                                                                           |
|                                     | Usage of 'health codes'                                             | Yes                                                                               | Yes                                                                                                                     | Yes                                                                                                                           |

<sup>a</sup> The national public health emergency consists of four-levels. Level IV response is the lowest level of emergency, whereby the response is coordinated at the district level with guidance from the Municipal Health Commission (if required). Guangdong is presently at Level III.
