# Supplementary material for: Seroprevalence of Antibodies to SARS-CoV-2 in Guangdong Province, China between March to June 2020
Source: MDPI journal article supplement (doi:10.3390/pathogens10111505), 2021-11-18
Supplement: s1 [file s1]

**Supplemental Table S4.** Pseudoparticle neutralization titers, expressed as 50% inhibitory concentration (IC<sub>50</sub>) of the SARS-CoV-2 IgG-positive samples, listed according to increasing S/CO values. S/CO refers to the signal/cut-off readout from the SARS-CoV-2 IgG-assay.

| Sample        | Age | Sex    | Location  | City Risk Level | S/CO <sup>a</sup> | IC <sub>50</sub> <sup>a</sup> |
|---------------|-----|--------|-----------|-----------------|-------------------|-------------------------------|
| <b>X1141</b>  | 60  | Female | Foshan    | High            | 1.002             | <20                           |
| <b>X707</b>   | 31  | Female | Shenzhen  | High            | 1.012             | 171                           |
| <b>X178</b>   | 55  | Male   | Guangzhou | High            | 1.034             | 96                            |
| <b>X102</b>   | 21  | Female | Huizhou   | High            | 1.04              | 47                            |
| <b>X4898</b>  | 82  | Male   | Shantou   | Low             | 1.174             | 46                            |
| <b>X89</b>    | 32  | Female | Guangzhou | High            | 1.21              | <20                           |
| <b>X162</b>   | 31  | Female | Shenzhen  | High            | 1.23              | <20                           |
| <b>X12208</b> | 50  | Male   | Qingyuan  | Low             | 1.418             | 179                           |
| <b>X10986</b> | 44  | Female | Zhongshan | High            | 1.427             | 440                           |
| <b>X3727</b>  | 89  | Male   | Jiangmen  | Low             | 1.541             | <20                           |
| <b>X1475</b>  | 11  | Male   | Shenzhen  | High            | 1.549             | 34                            |
| <b>X1337</b>  | 44  | Female | Foshan    | High            | 1.723             | 20                            |
| <b>X9951</b>  | 1   | Female | Shantou   | Low             | 1.759             | <20                           |
| <b>X5032</b>  | 62  | Male   | Shantou   | Low             | 1.764             | 51                            |
| <b>X11873</b> | 71  | Female | Zhuhai    | High            | 2.121             | <20                           |
| <b>X6922</b>  | 19  | Female | Foshan    | High            | 2.442             | <20                           |
| <b>X510</b>   | 27  | Female | Shenzhen  | High            | 4.658             | 30                            |
| <b>X220</b>   | 30  | Male   | Zhongshan | High            | 4.878             | 388                           |
| <b>X3972</b>  | 4   | Male   | Shenzhen  | High            | 9.3               | 106                           |
| <b>X12476</b> | 76  | Female | Zhuhai    | High            | 13.406            | 99                            |
| <b>X9864</b>  | 36  | Male   | Zhuhai    | High            | 15.515            | 194                           |

<sup>a</sup> No significant correlation as determined using Pearson's correlation test (r=0.223, p=0.33)
