# Supplementary material for: Seroprevalence of Antibodies to SARS-CoV-2 in Guangdong Province, China between March to June 2020
Source: MDPI journal article supplement (doi:10.3390/pathogens10111505), 2021-11-18
Supplement: s1 [file s1]

**Supplemental Table S3.** The age-specific SARS-CoV-2 seroprevalence in Guangdong province, and for cities of low or high risk of COVID-19 activities according to the local official surveillance data. The crude seroprevalences for individual age groups were present, while the overall age- and sex-weighted seroprevalences for cities of low or high risk of COVID-19 activities, and that of Guangdong province, were present.

| Risk level  | Age Group                  | Population Size <sup>a</sup> | Total Tested | Percentage of population sampled (%) | No. Positive | Estimated Seroprevalence (%) | 95% Confidence Interval (Lower) | 95% Confidence Interval (Upper) |
|-------------|----------------------------|------------------------------|--------------|--------------------------------------|--------------|------------------------------|---------------------------------|---------------------------------|
| Low         | 0 to 9                     | 8186351                      | 1015         | 0.012                                | 1            | 0.099                        | 0.002                           | 0.548                           |
| Low         | 10 to 19                   | 8300244                      | 318          | 0.004                                | 0            | 0.000                        | 0.000                           | 1.153                           |
| Low         | 20 to 39                   | 17121124                     | 1464         | 0.009                                | 0            | 0.000                        | 0.000                           | 0.252                           |
| Low         | 40 to 59                   | 15915092                     | 1218         | 0.008                                | 1            | 0.082                        | 0.002                           | 0.457                           |
| Low         | ≥60                        | 8787515                      | 1249         | 0.014                                | 3            | 0.240                        | 0.050                           | 0.700                           |
| <b>Low</b>  | <b>All ages (weighted)</b> | <b>58310326</b>              | <b>5264</b>  | <b>0.009</b>                         | <b>5</b>     | <b>0.071</b>                 | <b>0.000</b>                    | <b>0.244</b>                    |
| High        | 0 to 9                     | 4882700                      | 1954         | 0.040                                | 1            | 0.051                        | 0.001                           | 0.285                           |
| High        | 10 to 19                   | 4645156                      | 597          | 0.013                                | 2            | 0.335                        | 0.041                           | 1.205                           |
| High        | 20 to 39                   | 22416946                     | 2853         | 0.013                                | 7            | 0.245                        | 0.099                           | 0.505                           |
| High        | 40 to 59                   | 13736703                     | 1910         | 0.014                                | 3            | 0.157                        | 0.032                           | 0.458                           |
| High        | ≥60                        | 4468732                      | 2051         | 0.046                                | 3            | 0.146                        | 0.030                           | 0.427                           |
| <b>High</b> | <b>All ages (weighted)</b> | <b>50150237</b>              | <b>9365</b>  | <b>0.019</b>                         | <b>16</b>    | <b>0.194</b>                 | <b>0.060</b>                    | <b>0.329</b>                    |
| All         | 0 to 9                     | 13069051                     | 2969         | 0.023                                | 2            | 0.067                        | 0.008                           | 0.243                           |
| All         | 10 to 19                   | 12945400                     | 915          | 0.007                                | 2            | 0.219                        | 0.026                           | 0.787                           |
| All         | 20 to 39                   | 39538070                     | 4317         | 0.011                                | 7            | 0.162                        | 0.065                           | 0.334                           |
| All         | 40 to 59                   | 29651795                     | 3128         | 0.011                                | 4            | 0.128                        | 0.035                           | 0.327                           |
| All         | ≥60                        | 13256247                     | 3300         | 0.025                                | 6            | 0.182                        | 0.067                           | 0.395                           |
| <b>All</b>  | <b>All ages (weighted)</b> | <b>108460563</b>             | <b>14629</b> | <b>0.013</b>                         | <b>21</b>    | <b>0.148</b>                 | <b>0.057</b>                    | <b>0.240</b>                    |

<sup>a</sup> Based on 2015 Guangdong One Percent Survey [21]
