# Supplementary material for: Seroprevalence of Antibodies to SARS-CoV-2 in Guangdong Province, China between March to June 2020
Source: MDPI journal article supplement (doi:10.3390/pathogens10111505), 2021-11-18
Supplement: s1 [file s1]

**Supplemental Table S2.** The seropositivity for antibodies to SARS-CoV-2 in the prefectural cities of Guangdong province identified in the present study between March 11 and June 24, 2020. Since the number of seropositive samples were too low to estimate seroprevalence at the individual city level, percentage of seropositivity were used instead.

| Perfecture-City | Risk Level | Population Size <sup>a</sup> | Total Tested | Percentage of population sampled (%) | No. Positive | Seropositivity(%) |
|-----------------|------------|------------------------------|--------------|--------------------------------------|--------------|-------------------|
| Chaozhou        | Low        | 2656600                      | 195          | 0.007                                | 0            | 0.000             |
| Heyuan          | Low        | 3093900                      | 90           | 0.003                                | 0            | 0.000             |
| Jiangmen        | Low        | 4598200                      | 200          | 0.004                                | 1            | 0.005             |
| Jieyang         | Low        | 6089400                      | 435          | 0.007                                | 0            | 0.000             |
| Maoming         | Low        | 6313200                      | 886          | 0.014                                | 0            | 0.000             |
| Meizhou         | Low        | 4378800                      | 119          | 0.003                                | 0            | 0.000             |
| Qingyuan        | Low        | 3874000                      | 1126         | 0.029                                | 1            | 0.089             |
| Shantou         | Low        | 5638500                      | 497          | 0.009                                | 3            | 0.604             |
| Shanwei         | Low        | 2993600                      | 533          | 0.018                                | 0            | 0.000             |
| Shaoguan        | Low        | 2997600                      | 346          | 0.012                                | 0            | 0.000             |
| Yangjiang       | Low        | 2555600                      | 281          | 0.011                                | 0            | 0.000             |
| Yunfu           | Low        | 2526900                      | 161          | 0.006                                | 0            | 0.000             |
| Zhanjiang       | Low        | 7332000                      | 158          | 0.002                                | 0            | 0.000             |
| Zhaoqing        | Low        | 4151700                      | 237          | 0.006                                | 0            | 0.000             |
| Dongguan        | High       | 8392200                      | 1235         | 0.015                                | 0            | 0.000             |
| Foshan          | High       | 7905700                      | 1290         | 0.016                                | 3            | 0.233             |
| Guangzhou       | High       | 14904400                     | 2520         | 0.017                                | 2            | 0.079             |
| Huizhou         | High       | 4830000                      | 933          | 0.019                                | 1            | 0.107             |
| Shenzhen        | High       | 13026600                     | 2231         | 0.017                                | 5            | 0.224             |
| Zhongshan       | High       | 3310000                      | 450          | 0.014                                | 2            | 0.444             |
| Zhuhai          | High       | 1891100                      | 706          | 0.037                                | 3            | 0.425             |
| <b>Total</b>    |            | <b>113460000</b>             | <b>14629</b> |                                      | <b>21</b>    |                   |
| <b>Average</b>  |            |                              |              | <b>0.013</b>                         |              |                   |

<sup>a</sup> Source: Based on 2018 population data (to the nearest hundred) [29].
