# Supplementary material for: Seroprevalence of Antibodies to SARS-CoV-2 in Guangdong Province, China between March to June 2020
Source: Pathogens. 2021 Nov 18;10(11):1505. doi: 10.3390/pathogens10111505 (PMC8619097; doi:10.3390/pathogens10111505)
Supplement: Supplementary file 1 [file pathogens-10-01505-s001.zip]

Archive with 8 entries (8 files):
- Supplemental_Figure_S1.tiff
- Supplemental_File_S1.pdf
- Supplemental_File_S2.xlsx
- Supplemental_File_S3.xlsx
- Supplemental_Table_S1.pdf
- Supplemental_Table_S2.pdf
- Supplemental_Table_S3.pdf
- Supplemental_Table_S4.pdf
