# Supplementary material for: Seroprevalence of Antibodies to SARS-CoV-2 in Guangdong Province, China between March to June 2020
Source: Pathogens. 2021 Nov 18;10(11):1505. doi: 10.3390/pathogens10111505 (PMC8619097; doi:10.3390/pathogens10111505)
Supplement: Supplementary file 1 [file pathogens-10-01505-s001.zip › Supplemental_File_S2.xlsx]

## Sheet: Sheet1
Supplemental File S2. Daily case numbers of COVID-19 in Guangdong between January 19 and July 1, 2020. The daily numbers of asymptomatic cases prior to April 1, 2020 were not publicly accessible.
	Local cases		Imported cases		Imported associated cases
Date	Symptomatic	Asymptomatic	Symptomatic	Asymptomatic	Symptomatic	Asymptomatic
2020-01-19	1	N/A	0	N/A	0	N/A
2020-01-20	13	N/A	0	N/A	0	N/A
2020-01-21	12	N/A	0	N/A	0	N/A
2020-01-22	6	N/A	0	N/A	0	N/A
2020-01-23	21	N/A	0	N/A	0	N/A
2020-01-24	25	N/A	0	N/A	0	N/A
2020-01-25	20	N/A	0	N/A	0	N/A
2020-01-26	48	N/A	0	N/A	0	N/A
2020-01-27	42	N/A	0	N/A	0	N/A
2020-01-28	53	N/A	0	N/A	0	N/A
2020-01-29	70	N/A	0	N/A	0	N/A
2020-01-30	82	N/A	0	N/A	0	N/A
2020-01-31	127	N/A	0	N/A	0	N/A
2020-02-01	85	N/A	0	N/A	0	N/A
2020-02-02	79	N/A	0	N/A	0	N/A
2020-02-03	114	N/A	0	N/A	0	N/A
2020-02-04	73	N/A	0	N/A	0	N/A
2020-02-05	74	N/A	0	N/A	0	N/A
2020-02-06	74	N/A	0	N/A	0	N/A
2020-02-07	57	N/A	0	N/A	0	N/A
2020-02-08	45	N/A	0	N/A	0	N/A
2020-02-09	31	N/A	0	N/A	0	N/A
2020-02-10	26	N/A	0	N/A	0	N/A
2020-02-11	42	N/A	0	N/A	0	N/A
2020-02-12	22	N/A	0	N/A	0	N/A
2020-02-13	20	N/A	0	N/A	0	N/A
2020-02-14	33	N/A	0	N/A	0	N/A
2020-02-15	22	N/A	0	N/A	0	N/A
2020-02-16	6	N/A	0	N/A	0	N/A
2020-02-17	6	N/A	0	N/A	0	N/A
2020-02-18	3	N/A	0	N/A	0	N/A
2020-02-19	1	N/A	0	N/A	0	N/A
2020-02-20	1	N/A	0	N/A	0	N/A
2020-02-21	6	N/A	0	N/A	0	N/A
2020-02-22	3	N/A	0	N/A	0	N/A
2020-02-23	3	N/A	0	N/A	0	N/A
2020-02-24	2	N/A	0	N/A	0	N/A
2020-02-25	0	N/A	0	N/A	0	N/A
2020-02-26	0	N/A	0	N/A	0	N/A
2020-02-27	1	N/A	0	N/A	0	N/A
2020-02-28	1	N/A	0	N/A	0	N/A
2020-02-29	0	N/A	0	N/A	0	N/A
2020-03-01	0	N/A	1	N/A	0	N/A
2020-03-02	0	N/A	0	N/A	0	N/A
2020-03-03	0	N/A	0	N/A	0	N/A
2020-03-04	0	N/A	0	N/A	0	N/A
2020-03-05	1	N/A	0	N/A	0	N/A
2020-03-06	0	N/A	1	N/A	0	N/A
2020-03-07	0	N/A	0	N/A	0	N/A
2020-03-08	0	N/A	0	N/A	0	N/A
2020-03-09	0	N/A	1	N/A	0	N/A
2020-03-10	0	N/A	0	N/A	0	N/A
2020-03-11	0	N/A	3	N/A	0	N/A
2020-03-12	0	N/A	0	N/A	0	N/A
2020-03-13	0	N/A	0	N/A	0	N/A
2020-03-14	0	N/A	1	N/A	0	N/A
2020-03-15	0	N/A	4	N/A	0	N/A
2020-03-16	0	N/A	3	N/A	0	N/A
2020-03-17	0	N/A	5	N/A	0	N/A
2020-03-18	0	N/A	9	N/A	0	N/A
2020-03-19	0	N/A	14	N/A	0	N/A
2020-03-20	0	N/A	7	N/A	0	N/A
2020-03-21	0	N/A	7	N/A	1	N/A
2020-03-22	0	N/A	6	N/A	0	N/A
2020-03-23	1	N/A	14	N/A	0	N/A
2020-03-24	0	N/A	5	N/A	0	N/A
2020-03-25	0	N/A	11	N/A	0	N/A
2020-03-26	0	N/A	12	N/A	0	N/A
2020-03-27	0	N/A	11	N/A	0	N/A
2020-03-28	0	N/A	8	N/A	0	N/A
2020-03-29	0	N/A	9	N/A	0	N/A
2020-03-30	0	N/A	6	N/A	0	N/A
2020-03-31	1	1	10	N/A	0	N/A
2020-04-01	0	1	6	1	0	0
2020-04-02	0	0	6	0	1	0
2020-04-03	0	0	2	0	0	0
2020-04-04	0	2	3	0	5	0
2020-04-05	1	1	7	3	0	0
2020-04-06	0	1	1	3	0	1
2020-04-07	0	0	2	5	1	0
2020-04-08	0	0	1	4	2	0
2020-04-09	0	0	2	11	3	0
2020-04-10	0	0	1	10	3	0
2020-04-11	0	0	4	26	0	0
2020-04-12	1	0	0	31	2	0
2020-04-13	0	0	6	28	3	0
2020-04-14	0	1	0	0	2	17
2020-04-15	0	0	0	1	5	11
2020-04-16	0	1	1	1	5	22
2020-04-17	0	0	0	0	2	14
2020-04-18	1	2	0	2	0	10
2020-04-19	0	2	1	2	0	14
2020-04-20	0	0	0	0	1	6
2020-04-21	0	0	0	0	0	5
2020-04-22	0	0	1	1	1	3
2020-04-23	0	1	0	1	1	2
2020-04-24	0	0	0	0	0	3
2020-04-25	0	1	0	0	1	1
2020-04-26	0	0	1	0	0	3
2020-04-27	0	0	0	1	0	8
2020-04-28	1	0	0	0	0	0
2020-04-29	0	0	0	1	0	0
2020-04-30	0	2	0	0	0	1
2020-05-01	0	0	0	0	0	1
2020-05-02	0	0	0	0	0	1
2020-05-03	0	0	0	2	0	0
2020-05-04	0	1	0	0	0	0
2020-05-05	0	0	0	0	0	0
2020-05-06	0	0	1	0	0	0
2020-05-07	0	0	0	0	0	0
2020-05-08	0	0	0	0	0	0
2020-05-09	0	0	0	1	0	0
2020-05-10	0	0	0	0	0	0
2020-05-11	0	0	0	0	0	0
2020-05-12	0	0	0	1	0	0
2020-05-13	0	0	0	1	0	0
2020-05-14	0	0	0	1	0	0
2020-05-15	0	0	0	1	0	0
2020-05-16	0	0	1	0	0	0
2020-05-17	0	0	0	1	0	0
2020-05-18	0	0	0	0	0	0
2020-05-19	0	0	0	0	0	0
2020-05-20	0	0	1	1	0	0
2020-05-21	0	0	0	0	0	0
2020-05-22	0	0	0	0	0	0
2020-05-23	0	0	1	2	0	0
2020-05-24	0	0	0	0	0	0
2020-05-25	0	0	0	0	0	0
2020-05-26	0	0	0	0	0	0
2020-05-27	0	0	0	0	0	0
2020-05-28	0	0	0	1	0	0
2020-05-29	0	0	1	1	0	0
2020-05-30	0	0	0	0	0	0
2020-05-31	0	0	2	6	0	0
2020-06-01	0	0	1	4	0	0
2020-06-02	0	0	1	2	0	0
2020-06-03	0	0	1	1	0	0
2020-06-04	0	0	0	0	0	0
2020-06-05	0	0	3	0	0	0
2020-06-06	0	0	1	1	0	0
2020-06-07	0	0	0	0	0	0
2020-06-08	0	0	2	1	0	0
2020-06-09	0	0	0	0	0	0
2020-06-10	0	0	3	1	0	0
2020-06-11	0	0	0	0	0	0
2020-06-12	0	0	0	0	0	0
2020-06-13	0	0	1	0	0	0
2020-06-14	0	0	17	4	0	0
2020-06-15	0	0	0	2	0	0
2020-06-16	0	0	3	1	0	0
2020-06-17	0	0	0	1	0	0
2020-06-18	0	0	3	0	0	0
2020-06-19	0	0	3	3	0	0
2020-06-20	0	0	0	0	0	0
2020-06-21	0	0	0	0	0	0
2020-06-22	0	0	0	0	0	0
2020-06-23	0	0	0	0	0	0
2020-06-24	0	0	1	0	0	0
2020-06-25	0	0	0	0	0	0
2020-06-26	0	0	2	2	0	0
2020-06-27	0	0	0	0	0	0
2020-06-28	0	0	0	1	0	0
2020-06-29	0	0	4	1	0	0
2020-06-30	0	0	0	2	0	0
2020-07-01	0	0	1	0	0	0
