# Supplementary material for: Seroprevalence of Antibodies to SARS-CoV-2 in Guangdong Province, China between March to June 2020
Source: Pathogens. 2021 Nov 18;10(11):1505. doi: 10.3390/pathogens10111505 (PMC8619097; doi:10.3390/pathogens10111505)
Supplement: Supplementary file 1 [file pathogens-10-01505-s001.zip › Supplemental_File_S3.xlsx]

## Sheet: Inbound to Wuhan
Suupplemental File S3. Daily percentage of inbound and outbound events by rail, air and road traffic to and from Wuhan in the five days prior to the lockdown. Only the daily top 100-destination cities were reported by the website. Cities in Guangdong that were listed in daily the top-100 lists were highlighted.
	* The ratio of the number of people who migrated from A city to Wuhan to the total migration population to Wuhan
			2020-01-22					2020-01-21					2020-01-20					2020-01-19					2020-01-18
No.	Top Inbound to Wuhan_City		Proportion of migration source (%) *		No.	Top Inbound to Wuhan_City		Proportion of migration source (%) *		No.	Top Inbound to Wuhan_City		Proportion of migration source (%) *		No.	Top Inbound to Wuhan_City		Proportion of migration source (%) *		No.	Top Inbound to Wuhan_City		Proportion of migration source (%) *
1	Xiaogan	Hubei Province	0.1167		1	Xiaogan	Hubei Province	0.1085		1	Xiaogan	Hubei Province	0.1158		1	Xiaogan	Hubei Province	0.1144		1	Xiaogan	Hubei Province	0.1188
2	Huanggang	Hubei Province	0.1116		2	Huanggang	Hubei Province	0.1025		2	Huanggang	Hubei Province	0.1041		2	Huanggang	Hubei Province	0.1099		2	Huanggang	Hubei Province	0.0818
3	Ezhou	Hubei Province	0.0506		3	Jingzhou	Hubei Province	0.0497		3	Ezhou	Hubei Province	0.0505		3	Ezhou	Hubei Province	0.0549		3	Ezhou	Hubei Province	0.0531
4	Jingzhou	Hubei Province	0.0506		4	Xianning	Hubei Province	0.0486		4	Xianning	Hubei Province	0.048		4	Xianning	Hubei Province	0.0505		4	Xianning	Hubei Province	0.0512
5	Xianning	Hubei Province	0.0497		5	Shenzhen	Guangdong Province	0.0463		5	Jingzhou	Hubei Province	0.0446		5	Shenzhen	Guangdong Province	0.042		5	Jingzhou	Hubei Province	0.0439
6	Shenzhen	Guangdong Province	0.0436		6	Ezhou	Hubei Province	0.0453		6	Shenzhen	Guangdong Province	0.0439		6	Jingzhou	Hubei Province	0.0409		6	Shenzhen	Guangdong Province	0.0375
7	Huangshi	Hubei Province	0.0362		7	Shanghai		0.0352		7	Huangshi	Hubei Province	0.0373		7	Huangshi	Hubei Province	0.038		7	Huangshi	Hubei Province	0.0358
8	Shanghai		0.0335		8	Huangshi	Hubei Province	0.034		8	Shanghai		0.0339		8	Shanghai		0.0299		8	Shanghai		0.0354
9	Xiangyang	Hubei Province	0.0268		9	Beijing		0.0271		9	Beijing		0.0298		9	Beijing		0.0293		9	Beijing		0.0313
10	Beijing		0.0255		10	Guangzhou	Guangdong Province	0.0257		10	Xiangyang	Hubei Province	0.0247		10	Xiangyang	Hubei Province	0.026		10	Xiangyang	Hubei Province	0.0285
11	Guangzhou	Guangdong Province	0.0241		11	Xiangyang	Hubei Province	0.0251		11	Xiantao	Hubei Province	0.023		11	Xiantao	Hubei Province	0.0217		11	Guangzhou	Guangdong Province	0.026
12	Yichang	Hubei Province	0.0239		12	Jingmen	Hubei Province	0.0231		12	Guangzhou	Guangdong Province	0.0229		12	Guangzhou	Guangdong Province	0.0203		12	Jingmen	Hubei Province	0.0221
13	Jingmen	Hubei Province	0.0228		13	Xiantao	Hubei Province	0.0228		13	Yichang	Hubei Province	0.0209		13	Jingmen	Hubei Province	0.0201		13	Suizhou	Hubei Province	0.0212
14	Xiantao	Hubei Province	0.0228		14	Suizhou	Hubei Province	0.0217		14	Jingmen	Hubei Province	0.0208		14	Yichang	Hubei Province	0.0198		14	Xiantao	Hubei Province	0.0211
15	Suizhou	Hubei Province	0.0199		15	Yichang	Hubei Province	0.0214		15	Suizhou	Hubei Province	0.0207		15	Suizhou	Hubei Province	0.0185		15	Yichang	Hubei Province	0.0208
16	Shiyan	Hubei Province	0.017		16	Suzhou	Jiangsu Province	0.0151		16	Suzhou	Jiangsu Province	0.0157		16	Changsha	Hunan Province	0.0159		16	Changsha	Hunan Province	0.0165
17	Suzhou	Jiangsu Province	0.0157		17	Shiyan	Hubei Province	0.015		17	Changsha	Hunan Province	0.0138		17	Dongguan	Guangdong Province	0.0128		17	Dongguan	Guangdong Province	0.0138
18	Tianmen	Hubei Province	0.0153		18	Dongguan	Guangdong Province	0.015		18	Dongguan	Guangdong Province	0.0137		18	Hangzhou	Zhejiang Province	0.0123		18	Suzhou	Jiangsu Province	0.0132
19	Enshi Tujia and Miao Autonomous Prefecture	Hubei Province	0.0141		19	Tianmen	Hubei Province	0.0134		19	Hangzhou	Zhejiang Province	0.0126		19	Xinyang	Henan Province	0.0117		19	Hangzhou	Zhejiang Province	0.0124
20	Dongguan	Guangdong Province	0.0136		20	Hangzhou	Zhejiang Province	0.0132		20	Tianmen	Hubei Province	0.0122		20	Shiyan	Hubei Province	0.0117		20	Shiyan	Hubei Province	0.0123
21	Hangzhou	Zhejiang Province	0.0124		21	Changsha	Hunan Province	0.0131		21	Shiyan	Hubei Province	0.0118		21	Suzhou	Jiangsu Province	0.0117		21	Tianmen	Hubei Province	0.0118
22	Changsha	Hunan Province	0.0121		22	Enshi Tujia and Miao Autonomous Prefecture	Hubei Province	0.0126		22	Xinyang	Henan Province	0.0115		22	Tianmen	Hubei Province	0.0115		22	Xinyang	Henan Province	0.0109
23	Chongqing		0.0097		23	Chongqing		0.0096		23	Chongqing		0.0095		23	Chongqing		0.0097		23	Chongqing		0.01
24	Qianjiang	Hubei Province	0.0074		24	Xinyang	Henan Province	0.0086		24	Qianjiang	Hubei Province	0.008		24	Qianjiang	Hubei Province	0.0086		24	Qianjiang	Hubei Province	0.0092
25	Xinyang	Henan Province	0.0072		25	Chengdu	Sichuan Province	0.0079		25	Chengdu	Sichuan Province	0.0079		25	Zhengzhou	Henan Province	0.0082		25	Enshi Tujia and Miao Autonomous Prefecture	Hubei Province	0.0083
26	Nanjing	Jiangsu Province	0.0069		26	Qianjiang	Hubei Province	0.0076		26	Enshi Tujia and Miao Autonomous Prefecture	Hubei Province	0.0077		26	Chengdu	Sichuan Province	0.0081		26	Chengdu	Sichuan Province	0.0078
27	Ningbo	Zhejiang Province	0.0068		27	Ningbo	Zhejiang Province	0.0072		27	Ningbo	Zhejiang Province	0.0068		27	Enshi Tujia and Miao Autonomous Prefecture	Hubei Province	0.0079		27	Nanjing	Jiangsu Province	0.0076
28	Chengdu	Sichuan Province	0.0068		28	Foshan	Guangdong Province	0.0068		28	Zhengzhou	Henan Province	0.0067		28	Ningbo	Zhejiang Province	0.0074		28	Zhengzhou	Henan Province	0.0071
29	Xiamen	Fujian Province	0.0057		29	Nanjing	Jiangsu Province	0.0066		29	Nanjing	Jiangsu Province	0.0065		29	Wenzhou	Zhejiang Province	0.0069		29	Ningbo	Zhejiang Province	0.0068
30	Foshan	Guangdong Province	0.0056		30	Zhengzhou	Henan Province	0.0059		30	Foshan	Guangdong Province	0.0059		30	Nanjing	Jiangsu Province	0.0064		30	Wenzhou	Zhejiang Province	0.0066
31	Zhengzhou	Henan Province	0.0053		31	Xiamen	Fujian Province	0.0054		31	Hefei	Anhui Province	0.0058		31	Hefei	Anhui Province	0.0053		31	Foshan	Guangdong Province	0.006
32	Huizhou	Guangdong Province	0.0048		32	Hefei	Anhui Province	0.005		32	Xiamen	Fujian Province	0.0052		32	Xi'an	Shaanxi Province	0.005		32	Nanchang	Jiangxi Province	0.0058
33	Hefei	Anhui Province	0.0045		33	Fuzhou	Fujian Province	0.0047		33	Wenzhou	Zhejiang Province	0.0049		33	Fuzhou	Fujian Province	0.0049		33	Hefei	Anhui Province	0.0056
34	Fuzhou	Fujian Province	0.0044		34	Huizhou	Guangdong Province	0.0047		34	Nanchang	Jiangxi Province	0.0046		34	Xiamen	Fujian Province	0.0046		34	Xi'an	Shaanxi Province	0.0053
35	Nanchang	Jiangxi Province	0.0043		35	Nanchang	Jiangxi Province	0.0044		35	Jiujiang	Jiangxi Province	0.0042		35	Foshan	Guangdong Province	0.0046		35	Xiamen	Fujian Province	0.0046
36	Jiujiang	Jiangxi Province	0.0038		36	Yueyang	Hunan Province	0.0042		36	Fuzhou	Fujian Province	0.0042		36	Nanchang	Jiangxi Province	0.0046		36	Fuzhou	Fujian Province	0.0042
37	Wuxi	Jiangsu Province	0.0036		37	Jiujiang	Jiangxi Province	0.004		37	Xi'an	Shaanxi Province	0.0042		37	Yueyang	Hunan Province	0.0045		37	Jiujiang	Jiangxi Province	0.0042
38	Zhuhai	Guangdong Province	0.0035		38	Wuxi	Jiangsu Province	0.004		38	Yueyang	Hunan Province	0.004		38	Jiujiang	Jiangxi Province	0.0043		38	Wuxi	Jiangsu Province	0.0041
39	Xi'an	Shaanxi Province	0.0034		39	Xi'an	Shaanxi Province	0.0037		39	Wuxi	Jiangsu Province	0.004		39	Jinhua	Zhejiang Province	0.0038		39	Yueyang	Hunan Province	0.004
40	Yueyang	Hunan Province	0.0033		40	Zhuhai	Guangdong Province	0.0035		40	Zhuhai	Guangdong Province	0.0037		40	Huizhou	Guangdong Province	0.0037		40	Kunming	Yunnan Province	0.0039
41	Kunming	Yunnan Province	0.0033		41	Nanyang	Henan Province	0.0034		41	Huizhou	Guangdong Province	0.0037		41	Tianjin	Tianjin	0.0037		41	Tianjin	Tianjin	0.0037
42	Wenzhou	Zhejiang Province	0.0031		42	Tianjin	Tianjin	0.0033		42	Tianjin		0.0035		42	Quanzhou	Fujian Province	0.0036		42	Zhumadian	Henan Province	0.0037
43	Zhongshan	Guangdong Province	0.0031		43	Zhongshan	Guangdong Province	0.0033		43	Zhongshan	Guangdong Province	0.0033		43	Wuxi	Jiangsu Province	0.0035		43	Jinhua	Zhejiang Province	0.0037
44	Tianjin	Tianjin	0.003		44	Wenzhou	Zhejiang Province	0.0033		44	Jiaxing	Zhejiang Province	0.0033		44	Zhumadian	Henan Province	0.0034		44	Quanzhou	Fujian Province	0.0035
45	Changzhou	Jiangsu Province	0.0029		45	Zhumadian	Henan Province	0.0032		45	Zhumadian	Henan Province	0.0032		45	Kunming	Yunnan Province	0.0034		45	Huizhou	Guangdong Province	0.0033
46	Nanyang	Henan Province	0.0028		46	Jiaxing	Zhejiang Province	0.0029		46	Quanzhou	Fujian Province	0.0031		46	Taizhou	Zhejiang Province	0.0031		46	Nanyang	Henan Province	0.0032
47	Nanning	Guangxi Zhuang Autonomous Region	0.0027		47	Changzhou	Jiangsu Province	0.0029		47	Kunming	Yunnan Province	0.003		47	Nanyang	Henan Province	0.0031		47	Zhongshan	Guangdong Province	0.0032
48	Qingdao	Shandong Province	0.0024		48	Kunming	Yunnan Province	0.0029		48	Taizhou	Zhejiang Province	0.003		48	Nanning	Guangxi Zhuang Autonomous Region	0.003		48	Taizhou	Zhejiang Province	0.0028
49	Jiaxing	Zhejiang Province	0.0024		49	Jinhua	Zhejiang Province	0.0027		49	Nanyang	Henan Province	0.0029		49	Zhuhai	Guangdong Province	0.0029		49	Changzhou	Jiangsu Province	0.0027
50	Zhumadian	Henan Province	0.0023		50	Nanning	Guangxi Zhuang Autonomous Region	0.0027		50	Jinhua	Zhejiang Province	0.0029		50	Jiaxing	Zhejiang Province	0.0028		50	Jiaxing	Zhejiang Province	0.0027
51	Guiyang	Guizhou Province	0.0022		51	Qingdao	Shandong Province	0.0026		51	Changzhou	Jiangsu Province	0.0026		51	Zhongshan	Guangdong Province	0.0025		51	Zhuhai	Guangdong Province	0.0027
52	Guilin	Guangxi Zhuang Autonomous Region	0.0022		52	Nantong	Jiangsu Province	0.0025		52	Nantong	Jiangsu Province	0.0023		52	Changzhou	Jiangsu Province	0.0025		52	Qingdao	Shandong Province	0.0026
53	Nantong	Jiangsu Province	0.002		53	Quanzhou	Fujian Province	0.0024		53	Anqing	Anhui Province	0.0023		53	Qingdao	Shandong Province	0.0023		53	Nantong	Jiangsu Province	0.0024
54	Quanzhou	Fujian Province	0.002		54	Anqing	Anhui Province	0.0023		54	Nanning	Guangxi Zhuang Autonomous Region	0.0023		54	Guiyang	Guizhou Province	0.0023		54	Shaoxing	Zhejiang Province	0.0023
55	Sanya	Hainan Province	0.002		55	Taizhou	Zhejiang Province	0.0022		55	Qingdao	Shandong Province	0.0022		55	Anqing	Anhui Province	0.0022		55	Nanning	Guangxi Zhuang Autonomous Region	0.0021
56	Anqing	Anhui Province	0.0019		56	Guiyang	Guizhou Province	0.0021		56	Guiyang	Guizhou Province	0.0019		56	Shaoxing	Zhejiang Province	0.0022		56	Guiyang	Guizhou Province	0.0021
57	Zhuzhou	Hunan Province	0.0018		57	Haikou	Hainan Province	0.002		57	Shijiazhuang	Hebei Province	0.0019		57	Shijiazhuang	Hebei Province	0.0021		57	Shijiazhuang	Hebei Province	0.002
58	Jinhua	Zhejiang Province	0.0017		58	Fuyang	Anhui Province	0.002		58	Zhuzhou	Hunan Province	0.0019		58	Fuyang	Anhui Province	0.0019		58	Anqing	Anhui Province	0.0019
59	Beihai	Guangxi Zhuang Autonomous Region	0.0016		59	Shijiazhuang	Hebei Province	0.0018		59	Shaoxing	Zhejiang Province	0.0018		59	Nantong	Jiangsu Province	0.0018		59	Ganzhou	Jiangxi Province	0.0019
60	Taizhou	Zhejiang Province	0.0016		60	Changde	Hunan Province	0.0018		60	Fuyang	Anhui Province	0.0018		60	Zhuzhou	Hunan Province	0.0018		60	Fuyang	Anhui Province	0.0017
61	Changde	Hunan Province	0.0016		61	Shaoxing	Zhejiang Province	0.0017		61	Haikou	Hainan Province	0.0018		61	Hengyang	Hunan Province	0.0018		61	Zhuzhou	Hunan Province	0.0017
62	Fuyang	Anhui Province	0.0015		62	Hengyang	Hunan Province	0.0016		62	Sanya	Hainan Province	0.0017		62	Zhoukou	Henan Province	0.0018		62	Sanya	Hainan Province	0.0017
63	Haikou	Hainan Province	0.0015		63	Zhuzhou	Hunan Province	0.0016		63	Lu'an	Anhui Province	0.0017		63	Ganzhou	Jiangxi Province	0.0017		63	Jinan	Shandong Province	0.0016
64	Hengyang	Hunan Province	0.0013		64	Sanya	Hainan Province	0.0016		64	Hengyang	Hunan Province	0.0016		64	Haikou	Hainan Province	0.0017		64	Haikou	Hainan Province	0.0016
65	Shaoxing	Zhejiang Province	0.0013		65	Guilin	Guangxi Zhuang Autonomous Region	0.0016		65	Changde	Hunan Province	0.0016		65	Sanya	Hainan Province	0.0016		65	Lu'an	Anhui Province	0.0015
66	Jinan	Shandong Province	0.0013		66	Huzhou	Zhejiang Province	0.0015		66	Jinan	Shandong Province	0.0016		66	Lu'an	Anhui Province	0.0015		66	Hengyang	Hunan Province	0.0015
67	Liuzhou	Guangxi Zhuang Autonomous Region	0.0013		67	Ganzhou	Jiangxi Province	0.0015		67	Guilin	Guangxi Zhuang Autonomous Region	0.0016		67	Guilin	Guangxi Zhuang Autonomous Region	0.0015		67	Guilin	Guangxi Zhuang Autonomous Region	0.0015
68	Jiangmen	Guangdong	0.0012		68	Jinan	Shandong Province	0.0013		68	Ganzhou	Jiangxi Province	0.0015		68	Shenyang	Liaoning Province	0.0015		68	Dalian	Liaoning Province	0.0015
69	Zhoukou	Henan Province	0.0012		69	Yangzhou	Jiangsu Province	0.0013		69	Shenyang	Liaoning Province	0.0014		69	Jinan	Shandong Province	0.0014		69	Xuzhou	Jiangsu Province	0.0015
70	Shijiazhuang	Hebei Province	0.0012		70	Harbin	Heilongjiang Province	0.0013		70	Luoyang	Henan Province	0.0014		70	Huzhou	Zhejiang Province	0.0014		70	Changde	Hunan Province	0.0014
71	Yangzhou	Jiangsu Province	0.0012		71	Lu'an	Anhui Province	0.0012		71	Huzhou	Zhejiang Province	0.0013		71	Luoyang	Henan Province	0.0013		71	Zhoukou	Henan Province	0.0014
72	Shenyang	Liaoning Province	0.0011		72	Xuzhou	Jiangsu Province	0.0012		72	Zhoukou	Henan Province	0.0013		72	Beihai	Guangxi Zhuang Autonomous Region	0.0013		72	Huzhou	Zhejiang Province	0.0013
73	Shennongjia Forest Region	Hubei Province	0.0011		73	Zhenjiang	Jiangsu Province	0.0012		73	Xuzhou	Jiangsu Province	0.0013		73	Changde	Hunan Province	0.0013		73	Changchun	Jilin Province	0.0013
74	Urumqi	Xinjiang Uygur Autonomous Region	0.0011		74	Shenyang	Liaoning Province	0.0012		74	Wuhu	Anhui Province	0.0013		74	Harbin	Heilongjiang Province	0.0013		74	Shenyang	Liaoning Province	0.0013
75	Liu'an	Anhui Province	0.0011		75	Jiangmen	Guangdong Province	0.0011		75	Yangzhou	Jiangsu Province	0.0013		75	Baoding	Hebei Province	0.0012		75	Yangzhou	Jiangsu Province	0.0012
76	Zhenjiang	Jiangsu Province	0.0011		76	Xiangtan	Hunan Province	0.0011		76	Urumqi	Xinjiang Uygur Autonomous Region	0.0012		76	Dalian	Liaoning Province	0.0012		76	Shangrao	Jiangxi Province	0.0012
77	Xuzhou	Jiangsu Province	0.0011		77	Zhoukou	Henan Province	0.0011		77	Baoding	Hebei Province	0.0012		77	Shangqiu	Henan Province	0.0012		77	Harbin	Heilongjiang Province	0.0012
78	Ganzhou	Jiangxi Province	0.001		78	Luoyang	Henan Province	0.0011		78	Zhenjiang	Jiangsu Province	0.0011		78	Shangrao	Jiangxi Province	0.0012		78	Shantou	Guangdong Province	0.0012
79	Taizhou	Jiangsu Province	0.001		79	Urumqi	Xinjiang Uygur Autonomous Region	0.0011		79	Shanxi Province	Taiyuan City	0.0011		79	Luohe	Henan Province	0.0011		79	Shanxi Province	Taiyuan City	0.0011
80	Shangqiu	Henan Province	0.001		80	Wuhu	Anhui Province	0.0011		80	Jiangmen	Guangdong Province	0.0011		80	Shanxi Province	Taiyuan City	0.0011		80	Luoyang	Henan Province	0.0011
81	Wuhu	Anhui Province	0.001		81	Ji'an	Jiangxi Province	0.0011		81	Shangqiu	Henan Province	0.0011		81	Xuzhou	Jiangsu Province	0.0011		81	Taizhou	Jiangsu Province	0.0011
82	Yichun	Jiangxi Province	0.001		82	Shanxi Province	Taiyuan	0.0011		82	Dalian	Liaoning Province	0.0011		82	Kaifeng	Henan Province	0.0011		82	Zhangzhou	Fujian Province	0.0011
83	Ji'an	Jiangxi Province	0.001		83	Taizhou	Jiangsu Province	0.001		83	Shangrao	Jiangxi Province	0.001		83	Handan	Hebei Province	0.001		83	Shangqiu	Henan Province	0.0011
84	Yiyang	Hunan Province	0.0009		84	Shangqiu	Henan Province	0.001		84	Langfang	Hebei Province	0.001		84	Xinxiang	Henan Province	0.001		84	Yichun	Jiangxi Province	0.0011
85	Luoyang	Henan Province	0.0009		85	Yichun	Jiangxi Province	0.001		85	Xiangtan	Hunan Province	0.001		85	Yangzhou	Jiangsu Province	0.001		85	Lanzhou	Gansu Province	0.001
86	Luohe	Henan Province	0.0009		86	Baoding	Hebei Province	0.001		86	Beihai	Guangxi Zhuang Autonomous Region	0.001		86	Putian	Fujian Province	0.001		86	Baoding	Hebei Province	0.001
87	Zhangzhou	Fujian Province	0.0009		87	Putian	Fujian Province	0.001		87	Yichun	Jiangxi Province	0.001		87	Ningde	Fujian Province	0.001		87	Jiangmen	Guangdong Province	0.001
88	Shantou	Guangdong Province	0.0008		88	Shennongjia Forest Region	Hubei Province	0.0009		88	Luohe	Henan Province	0.001		88	Wuhu	Anhui Province	0.001		88	Wuhu	Anhui Province	0.001
89	Xiangtan	Hunan Province	0.0008		89	Luohe	Henan Province	0.0009		89	Harbin	Heilongjiang Province	0.0009		89	Xuchang	Henan Province	0.001		89	Handan	Hebei Province	0.001
90	Huzhou	Zhejiang Province	0.0008		90	Dalian	Liaoning Province	0.0009		90	Taizhou	Jiangsu Province	0.0009		90	Yantai	Shandong Province	0.0009		90	Liuzhou	Guangxi Zhuang Autonomous Region	0.001
91	Loudi	Hunan Province	0.0008		91	Shantou	Guangdong Province	0.0009		91	Yiyang	Hunan Province	0.0009		91	Urumqi	Xinjiang Uygur Autonomous Region	0.0009		91	Zhanjiang	Guangdong Province	0.0009
92	Shanxi Province	Taiyuan	0.0008		92	Lianyungang	Jiangsu Province	0.0009		92	Putian	Fujian Province	0.0009		92	Changchun	Jilin Province	0.0009		92	Xinxiang	Henan Province	0.0009
93	Lianyungang	Jiangsu Province	0.0008		93	Lanzhou	Gansu Province	0.0009		93	Pingdingshan	Henan Province	0.0009		93	Lanzhou	Gansu Province	0.0009		93	Langfang	Hebei Province	0.0009
94	Qingyuan	Guangdong Province	0.0008		94	Shaoyang	Hunan Province	0.0009		94	Handan	Hebei Province	0.0008		94	Yiyang	Hunan Province	0.0009		94	Kaifeng	Henan Province	0.0009
95	Fuzhou	Jiangxi Province	0.0007		95	Liuzhou	Guangxi Zhuang Autonomous Region	0.0009		95	Liuzhou	Guangxi Zhuang Autonomous Region	0.0008		95	Taizhou	Jiangsu Province	0.0009		95	Urumqi	Xinjiang Uygur Autonomous Region	0.0009
96	Shaoyang	Hunan Province	0.0007		96	Yiyang	Hunan Province	0.0009		96	Zhanjiang	Guangdong Province	0.0008		96	Langfang	Hebei Province	0.0009		96	Yiyang	Hunan Province	0.0009
97	Harbin	Heilongjiang Province	0.0007		97	Beihai	Guangxi Zhuang Autonomous Region	0.0008		97	Ji'an	Jiangxi Province	0.0008		97	Jiangmen	Guangdong Province	0.0009		97	Xiangtan	Hunan Province	0.0009
98	Langfang	Hebei Province	0.0007		98	Zhangzhou	Fujian Province	0.0008		98	Xuchang	Henan Province	0.0008		98	Xiangtan	Hunan Province	0.0008		98	Luohe	Henan Province	0.0009
99	Shaoguan	Guangdong Province	0.0007		99	Chenzhou	Hunan Province	0.0008		99	Shennongjia Forest Region	Hubei Province	0.0008		99	Yichun	Jiangxi Province	0.0008		99	Xuchang	Henan Province	0.0009
100	Pingdingshan	Henan Province	0.0007		100	Xuchang	Henan Province	0.0008		100	Yantai	Shandong Province	0.0008		100	Pingdingshan	Henan Province	0.0008		100	Putian	Fujian Province	0.0008

## Sheet: Outbound from Wuhan
	** The ratio of the number of people emigrating to A city from Wuhan to the total population emigrating from Wuhan
			2020-01-22					2020-01-21					2020-01-20					2020-01-19					2020-01-18
No.	Top Outward Bound from Wuhan_City		Proportion of emigration destination**		No.	Top Outward Bound from Wuhan_City		Proportion of emigration destination**		No.	Top Outward Bound from Wuhan_City		Proportion of emigration destination**		No.	Top Outward Bound from Wuhan_City		Proportion of emigration destination**		No.	Top Outward Bound from Wuhan_City		Proportion of emigration destination**
1	Xiaogan	Hubei Province	0.1456		1	Xiaogan	Hubei Province	0.1387		1	Xiaogan	Hubei Province	0.1424		1	Xiaogan	Hubei Province	0.1447		1	Huanggang	Hubei Province	0.1487
2	Huanggang	Hubei Province	0.1408		2	Huanggang	Hubei Province	0.135		2	Huanggang	Hubei Province	0.1245		2	Huanggang	Hubei Province	0.1228		2	Xiaogan	Hubei Province	0.1314
3	Jingzhou	Hubei Province	0.0765		3	Jingzhou	Hubei Province	0.0717		3	Jingzhou	Hubei Province	0.0729		3	Jingzhou	Hubei Province	0.0693		3	Jingzhou	Hubei Province	0.0629
4	Xianning	Hubei Province	0.0474		4	Xianning	Hubei Province	0.0477		4	Xianning	Hubei Province	0.0475		4	Xianning	Hubei Province	0.0495		4	Xianning	Hubei Province	0.0514
5	Xiangyang	Hubei Province	0.045		5	Xiangyang	Hubei Province	0.0444		5	Xiangyang	Hubei Province	0.0408		5	Ezhou	Hubei Province	0.0391		5	Ezhou	Hubei Province	0.0439
6	Jingmen	Hubei Province	0.0419		6	Jingmen	Hubei Province	0.0376		6	Huangshi	Hubei Province	0.037		6	Xiangyang	Hubei Province	0.0381		6	Huangshi	Hubei Province	0.0421
7	Huangshi	Hubei Province	0.0386		7	Huangshi	Hubei Province	0.0374		7	Jingmen	Hubei Province	0.0359		7	Huangshi	Hubei Province	0.0375		7	Xiangyang	Hubei Province	0.0363
8	Suizhou	Hubei Province	0.0379		8	Suizhou	Hubei Province	0.0354		8	Ezhou	Hubei Province	0.0353		8	Jingmen	Hubei Province	0.0331		8	Suizhou	Hubei Province	0.0311
9	Xiantao	Hubei Province	0.033		9	Ezhou	Hubei Province	0.0328		9	Suizhou	Hubei Province	0.0338		9	Suizhou	Hubei Province	0.0321		9	Jingmen	Hubei Province	0.0296
10	Ezhou	Hubei Province	0.0328		10	Xiantao	Hubei Province	0.0323		10	Xiantao	Hubei Province	0.0311		10	Xiantao	Hubei Province	0.0307		10	Xiantao	Hubei Province	0.0291
11	Yichang	Hubei Province	0.0318		11	Yichang	Hubei Province	0.0305		11	Yichang	Hubei Province	0.0295		11	Yichang	Hubei Province	0.0269		11	Yichang	Hubei Province	0.0254
12	Tianmen	Hubei Province	0.0234		12	Tianmen	Hubei Province	0.0228		12	Tianmen	Hubei Province	0.0243		12	Tianmen	Hubei Province	0.0233		12	Tianmen	Hubei Province	0.021
13	Shiyan	Hubei Province	0.0206		13	Shiyan	Hubei Province	0.02		13	Shiyan	Hubei Province	0.0197		13	Shiyan	Hubei Province	0.0184		13	Enshi Tujia and Miao Autonomous Prefecture	Hubei Province	0.018
14	Xinyang	Henan Province	0.0176		14	Enshi Tujia and Miao Autonomous Prefecture	Hubei Province	0.0183		14	Enshi Tujia and Miao Autonomous Prefecture	Hubei Province	0.0187		14	Enshi Tujia and Miao Autonomous Prefecture	Hubei Province	0.0174		14	Shiyan	Hubei Province	0.0165
15	Enshi Tujia and Miao Autonomous Prefecture	Hubei Province	0.0176		15	Xinyang	Henan Province	0.0168		15	Xinyang	Henan Province	0.0157		15	Xinyang	Henan Province	0.0145		15	Xinyang	Henan Province	0.0135
16	Qianjiang	Hubei Province	0.0135		16	Chongqing		0.0125		16	Chongqing		0.0127		16	Chongqing		0.0129		16	Chongqing		0.0127
17	Chongqing		0.0104		17	Qianjiang	Hubei Province	0.0119		17	Qianjiang	Hubei Province	0.0117		17	Qianjiang	Hubei Province	0.0104		17	Qianjiang	Hubei Province	0.0103
18	Nanyang	Henan Province	0.0077		18	Nanyang	Henan Province	0.0082		18	Nanyang	Henan Province	0.0082		18	Changsha	Hunan Province	0.0079		18	Changsha	Hunan Province	0.0102
19	Zhumadian	Henan Province	0.0066		19	Zhumadian	Henan Province	0.0073		19	Changsha	Hunan Province	0.0075		19	Nanyang	Henan Province	0.0072		19	Beijing		0.0073
20	Changsha	Hunan Province	0.006		20	Changsha	Hunan Province	0.0066		20	Zhumadian	Henan Province	0.0072		20	Zhumadian	Henan Province	0.0068		20	Nanyang	Henan Province	0.007
21	Yueyang	Hunan Province	0.0058		21	Yueyang	Hunan Province	0.0056		21	Beijing		0.0056		21	Beijing		0.0068		21	Zhumadian	Henan Province	0.0068
22	Jiujiang	Jiangxi Province	0.005		22	Zhoukou	Henan Province	0.0051		22	Zhoukou	Henan Province	0.0054		22	Shanghai		0.0056		22	Zhengzhou	Henan Province	0.0062
23	Anqing	Anhui Province	0.005		23	Anqing	Anhui Province	0.005		23	Zhengzhou	Henan Province	0.0052		23	Jiujiang	Jiangxi Province	0.0052		23	Shanghai		0.006
24	Zhoukou	Henan Province	0.0042		24	Jiujiang	Jiangxi Province	0.005		24	Jiujiang	Jiangxi Province	0.0048		24	Yueyang	Hunan Province	0.0052		24	Jiujiang	Jiangxi Province	0.0057
25	Changde	Hunan Province	0.004		25	Beijing		0.0047		25	Yueyang	Hunan Province	0.0047		25	Zhoukou	Henan Province	0.0051		25	Anqing	Anhui Province	0.0057
26	Beijing		0.0039		26	Zhengzhou	Henan Province	0.0044		26	Shanghai		0.0046		26	Zhengzhou	Henan Province	0.0051		26	Yueyang	Hunan Province	0.0054
27	Nanchang	Jiangxi Province	0.0038		27	Guangzhou	Guangdong province	0.0041		27	Nanchang	Jiangxi Province	0.0043		27	Nanchang	Jiangxi Province	0.0048		27	Nanchang	Jiangxi Province	0.0046
28	Guangzhou	Guangdong province	0.0037		28	Changde	Hunan Province	0.0041		28	Anqing	Anhui Province	0.0043		28	Chengdu	Sichuan Province	0.0045		28	Chengdu	Sichuan Province	0.0046
29	Shenzhen	Guangdong province	0.0035		29	Shangqiu	Henan Province	0.004		29	Fuyang	Anhui Province	0.0043		29	Anqing	Anhui Province	0.0045		29	Zhoukou	Henan Province	0.0046
30	Shangqiu	Henan Province	0.0033		30	Nanchang	Jiangxi Province	0.004		30	Shangqiu	Henan Province	0.0043		30	Guangzhou	Guangdong Province	0.0044		30	Shenzhen	Guangdong Province	0.0041
31	Fuyang	Anhui Province	0.0033		31	Shenzhen	Guangdong Province	0.0039		31	Guangzhou	Guangdong Province	0.004		31	Shenzhen	Guangdong Province	0.0043		31	Hefei	Anhui Province	0.004
32	Zhengzhou	Henan Province	0.0031		32	Fuyang	Anhui Province	0.0038		32	Shenzhen	Guangdong Province	0.004		32	Changde	Hunan Province	0.004		32	Guangzhou	Guangdong Province	0.0039
33	Chengdu	Sichuan Province	0.0029		33	Shanghai		0.0033		33	Changde	Hunan Province	0.0038		33	Shangqiu	Henan Province	0.0038		33	Changde	Hunan Province	0.0037
34	Shanghai		0.0028		34	Chengdu	Sichuan Province	0.0033		34	Chengdu	Sichuan Province	0.0037		34	Fuyang	Anhui Province	0.0036		34	Shangqiu	Henan Province	0.0034
35	Yichun	Jiangxi Province	0.0026		35	Xi'an	Shaanxi Province	0.0028		35	Hefei	Anhui Province	0.003		35	Xi'an	Shaanxi Province	0.0034		35	Fuyang	Anhui Province	0.0034
36	Hefei	Anhui Province	0.0025		36	Yichun	Jiangxi Province	0.0027		36	Yichun	Jiangxi Province	0.0029		36	Hefei	Anhui Province	0.0034		36	Xi'an	Shaanxi Province	0.0032
37	Hengyang	Hunan Province	0.0024		37	Hefei	Anhui Province	0.0027		37	Xi'an	Shaanxi Province	0.0029		37	Yichun	Jiangxi Province	0.003		37	Yichun	Jiangxi Province	0.0032
38	Yiyang	Hunan Province	0.0024		38	Hengyang	Hunan Province	0.0025		38	Wenzhou	Zhejiang Province	0.0028		38	Hengyang	Hunan Province	0.0025		38	Nanjing	Jiangsu Province	0.0028
39	Luohe	Henan Province	0.0022		39	Wenzhou	Zhejiang Province	0.0024		39	Hengyang	Hunan Province	0.0027		39	Wenzhou	Zhejiang Province	0.0024		39	Hangzhou	Zhejiang Province	0.0027
40	Wenzhou	Zhejiang Province	0.0022		40	Shaoyang	Hunan Province	0.0023		40	Shaoyang	Hunan Province	0.0022		40	Quanzhou	Fujian Province	0.0024		40	Loudi	Hunan Province	0.0026
41	Xi'an	Shaanxi Province	0.0021		41	Yiyang	Hunan Province	0.0021		41	Nanjing	Jiangsu Province	0.0021		41	Kunming	Yunnan Province	0.0022		41	Hengyang	Hunan Province	0.0025
42	Shaoyang	Hunan Province	0.002		42	Lu'an	Anhui Province	0.0021		42	Luohe	Henan Province	0.0021		42	Loudi	Hunan Province	0.0022		42	Quanzhou	Fujian Province	0.0024
43	Lu'an	Anhui Province	0.0019		43	Shangrao	Jiangxi Province	0.002		43	Fuzhou	Fujian Province	0.002		43	Shaoyang	Hunan Province	0.0022		43	Wenzhou	Zhejiang Province	0.0024
44	Fuzhou	Fujian Province	0.0018		44	Luohe	Henan Province	0.0019		44	Loudi	Hunan Province	0.002		44	Nanjing	Jiangsu Province	0.0021		44	Shaoyang	Hunan Province	0.0022
45	Quanzhou	Fujian Province	0.0017		45	Kaifeng	Henan Province	0.0019		45	Xuchang	Henan Province	0.002		45	Hangzhou	Zhejiang Province	0.002		45	Zhuzhou	Hunan Province	0.0021
46	Zhuzhou	Hunan Province	0.0017		46	Kunming	Yunnan Province	0.0019		46	Luoyang	Henan Province	0.002		46	Luoyang	Henan Province	0.002		46	Yiyang	Hunan Province	0.0021
47	Kunming	Yunnan Province	0.0017		47	Quanzhou	Fujian Province	0.0019		47	Yiyang	Hunan Province	0.002		47	Fuzhou	Fujian Province	0.0019		47	Shangrao	Jiangxi Province	0.002
48	Loudi	Hunan Province	0.0017		48	Xuchang	Henan Province	0.0018		48	Kunming	Yunnan Province	0.0019		48	Xuchang	Henan Province	0.0019		48	Kunming	Yunnan Province	0.002
49	Shangrao	Jiangxi Province	0.0016		49	Loudi	Hunan Province	0.0018		49	Xinxiang	Henan Province	0.0019		49	Xinxiang	Henan Province	0.0019		49	Fuzhou	Fujian Province	0.002
50	Xuchang	Henan Province	0.0015		50	Zhuzhou	Hunan Province	0.0018		50	Quanzhou	Fujian Province	0.0019		50	Zhuzhou	Hunan Province	0.0018		50	Luohe	Henan Province	0.0019
51	Xinxiang	Henan Province	0.0015		51	Fuzhou	Fujian Province	0.0017		51	Heze	Shandong Province	0.0019		51	Shangrao	Jiangxi Province	0.0018		51	Ganzhou	Jiangxi Province	0.0018
52	Heze	Shandong Province	0.0015		52	Luoyang	Henan Province	0.0017		52	Lu'an	Anhui Province	0.0018		52	Fuzhou	Jiangxi Province	0.0018		52	Suzhou	Jiangsu Province	0.0018
53	Kaifeng	Henan Province	0.0014		53	Xinxiang	Henan Province	0.0017		53	Kaifeng	Henan Province	0.0018		53	Heze	Shandong Province	0.0018		53	Lu'an	Anhui Province	0.0018
54	Pingdingshan	Henan Province	0.0014		54	Anyang	Henan Province	0.0017		54	Zhuzhou	Hunan Province	0.0017		54	Lu'an	Anhui Province	0.0018		54	Luoyang	Henan Province	0.0017
55	Shijiazhuang	Hebei Province	0.0014		55	Nanjing	Jiangsu Province	0.0016		55	Hangzhou	Zhejiang Province	0.0017		55	Yiyang	Hunan Province	0.0018		55	Shijiazhuang	Hebei Province	0.0017
56	Luoyang	Henan Province	0.0014		56	Heze	Shandong Province	0.0016		56	Anyang	Henan Province	0.0017		56	Harbin	Heilongjiang Province	0.0018		56	Xinxiang	Henan Province	0.0017
57	Ganzhou	Jiangxi Province	0.0014		57	Xuzhou	Jiangsu Province	0.0016		57	Shangrao	Jiangxi Province	0.0016		57	Luohe	Henan Province	0.0018		57	Harbin	Heilongjiang Province	0.0017
58	Fuzhou	Jiangxi Province	0.0014		58	Shijiazhuang	Hebei Province	0.0015		58	Harbin	Heilongjiang Province	0.0016		58	Xiamen	Fujian Province	0.0018		58	Fuzhou	Jiangxi Province	0.0016
59	Ji'an	Jiangxi Province	0.0013		59	Xiamen	Fujian Province	0.0015		59	Ji'an	Jiangxi Province	0.0016		59	Anyang	Henan Province	0.0018		59	Xuzhou	Jiangsu Province	0.0016
60	Anyang	Henan Province	0.0013		60	Xiangtan	Hunan Province	0.0015		60	Xingtai	Hebei Province	0.0016		60	Ganzhou	Jiangxi Province	0.0017		60	Handan	Hebei Province	0.0016
61	Nanjing	Jiangsu Province	0.0013		61	Pingdingshan	Henan Province	0.0015		61	Fuzhou	Jiangxi Province	0.0016		61	Xingtai	Hebei Province	0.0016		61	Heze	Shandong Province	0.0016
62	Xuzhou	Jiangsu Province	0.0012		62	Fuzhou	Jiangxi Province	0.0015		62	Xuzhou	Jiangsu Province	0.0016		62	Nanning	Guangxi Zhuang Autonomous Region	0.0016		62	Nantong	Jiangsu Province	0.0015
63	Xiangtan	Hunan Province	0.0012		63	Yongzhou	Hunan Province	0.0015		63	Ganzhou	Jiangxi Province	0.0016		63	Handan	Hebei Province	0.0016		63	Xuchang	Henan Province	0.0015
64	Handan	Hebei Province	0.0012		64	Hangzhou	Zhejiang Province	0.0015		64	Handan	Hebei Province	0.0015		64	Shijiazhuang	Hebei Province	0.0016		64	Xingtai	Hebei Province	0.0015
65	Chenzhou	Hunan Province	0.0012		65	Ganzhou	Jiangxi Province	0.0014		65	Pingdingshan	Henan Province	0.0015		65	Ankang	Shaanxi Province	0.0016		65	Kaifeng	Henan Province	0.0014
66	Yongzhou	Hunan Province	0.0011		66	Handan	Hebei Province	0.0014		66	Shijiazhuang	Hebei Province	0.0015		66	Kaifeng	Henan Province	0.0016		66	Tianjin	Tianjin	0.0014
67	Sanya	Hainan Province	0.0011		67	Ji'an	Jiangxi Province	0.0014		67	Nanning	Guangxi Zhuang Autonomous Region	0.0015		67	Nantong	Jiangsu Province	0.0015		67	Xiamen	Fujian Province	0.0014
68	Harbin	Heilongjiang Province	0.0011		68	Dazhou	Sichuan Province	0.0013		68	Xiamen	Fujian Province	0.0014		68	Suzhou	Jiangsu Province	0.0015		68	Anyang	Henan Province	0.0014
69	Wuhu	Anhui Province	0.0011		69	Sanya	Hainan Province	0.0013		69	Sanya	Hainan Province	0.0014		69	Sanya	Hainan Province	0.0014		69	Pingdingshan	Henan Province	0.0014
70	Xiamen	Fujian Province	0.0011		70	Guilin	Guangxi Zhuang Autonomous Region	0.0013		70	Yongzhou	Hunan Province	0.0014		70	Ji'an	Jiangxi Province	0.0014		70	Yongzhou	Hunan Province	0.0014
71	Huizhou	Guangdong Province	0.0011		71	Wuhu	Anhui Province	0.0012		71	Guilin	Guangxi Zhuang Autonomous Region	0.0014		71	Tianjin		0.0014		71	Nanning	Guangxi Zhuang Autonomous Region	0.0013
72	Huaihua	Hunan Province	0.0011		72	Xingtai	Hebei Province	0.0012		72	Bozhou	Anhui Province	0.0014		72	Dazhou	Sichuan Province	0.0014		72	Xiangtan	Hunan Province	0.0013
73	Guilin	Guangxi Zhuang Autonomous Region	0.0011		73	Harbin	Heilongjiang Province	0.0012		73	Beihai	Guangxi Zhuang Autonomous Region	0.0013		73	Pingdingshan	Henan Province	0.0014		73	Taizhou	Zhejiang Province	0.0012
74	Nanning	Guangxi Zhuang Autonomous Region	0.0011		74	Nanning	Guangxi Zhuang Autonomous Region	0.0011		74	Huaihua	Hunan Province	0.0013		74	Guilin	Guangxi Zhuang Autonomous Region			74	Qingdao	Shandong Province	0.0012
75	Hangzhou	Zhejiang Province	0.0011		75	Huaihua	Hunan Province	0.0011		75	Suzhou	Jiangsu Province	0.0012		75	Yongzhou	Hunan Province	0.0014		75	Ji'an	Jiangxi Province	0.0012
76	Dazhou	Sichuan Province	0.001		76	Nantong	Jiangsu Province	0.0011		76	Nantong	Jiangsu Province	0.0012		76	Xiangtan	Hunan Province	0.0014		76	Baoding	Hebei Province	0.0012
77	Dongguan	Guangdong Province	0.0009		77	Chenzhou	Hunan Province	0.0011		77	Dazhou	Sichuan Province	0.0012		77	Xuzhou	Jiangsu Province	0.0013		77	Sanya	Hainan Province	0.0012
78	Nantong	Jiangsu Province	0.0009		78	Zhuhai	Guangdong Province	0.0011		78	Suzhou	Anhui Province	0.0012		78	Beihai	Guangxi Zhuang Autonomous Region			78	Wuxi	Jiangsu Province	0.0012
79	Bozhou	Anhui Province	0.0009		79	Taizhou	Zhejiang Province	0.0011		79	Taizhou	Zhejiang Province	0.0012		79	Cangzhou	Hebei Province	0.0013		79	Wuhu	Anhui Province	0.0012
80	Suzhou	Anhui Province	0.0009		80	Suzhou	Anhui Province	0.0011		80	Ankang	Shaanxi Province	0.0012		80	Bozhou	Anhui Province	0.0013		80	Bozhou	Anhui Province	0.0012
81	Zhuhai	Guangdong Province	0.0009		81	Suzhou	Jiangsu Province	0.0011		81	Chenzhou	Hunan Province	0.0012		81	Taizhou	Zhejiang Province	0.0013		81	Suzhou	Anhui Province	0.0011
82	Xingtai	Hebei Province	0.0009		82	Nanchong	Sichuan Province	0.001		82	Xiangtan	Hunan Province	0.0012		82	Baoding	Hebei Province	0.0011		82	Jinan	Shandong Province	0.0011
83	Baoding	Hebei Province	0.0009		83	Bozhou	Anhui Province	0.001		83	Baoding	Hebei Province	0.0012		83	Jinhua	Zhejiang Province	0.0011		83	Taizhou	Jiangsu Province	0.0011
84	Beihai	Guangxi Zhuang Autonomous Region	0.0009		84	Ankang	Shaanxi Province	0.001		84	Tianjin	Tianjin	0.0011		84	Putian	Fujian Province	0.0011		84	Yangzhou	Jiangsu Province	0.0011
85	Puyang	Henan Province	0.0009		85	Jiaozuo	Henan Province	0.001		85	Wuhu	Anhui Province	0.0011		85	Wuhu	Anhui Province	0.0011		85	Huaihua	Hunan Province	0.0011
86	Haikou	Hainan Province	0.0009		86	Puyang	Henan Province	0.001		86	Cangzhou	Hebei Province	0.0011		86	Taizhou	Jiangsu Province	0.0011		86	Dazhou	Sichuan Province	0.0011
87	Yancheng	Jiangsu Province	0.0009		87	Jinhua	Zhejiang Province	0.001		87	Nanchong	Sichuan Province	0.001		87	Shenyang	Liaoning Province	0.0011		87	Guiyang	Guizhou Province	0.0011
88	Suzhou	Jiangsu Province	0.0009		88	Shennongjia Forest Region	Hubei Province	0.001		88	Zhuhai	Guangdong Province	0.001		88	Qingdao	Shandong Province	0.0011		88	Linyi	Shandong Province	0.0011
89	Taizhou	Jiangsu Province	0.0009		89	Baoding	Hebei Province	0.001		89	Yuncheng	Shanxi Province	0.001		89	Chenzhou	Hunan Province	0.0011		89	Chenzhou	Hunan Province	0.0011
90	Ankang	Shaanxi Province	0.0009		90	Linyi	Shandong Province	0.001		90	Jining	Shandong Province	0.001		90	Taiyuan	Shanxi Province	0.0011		90	Dongguan	Guangdong Province	0.0011
91	Jiaozuo	Henan Province	0.0008		91	Jining	Shandong Province	0.0009		91	Jinhua	Zhejiang Province	0.001		91	Zhuhai	Guangdong Province	0.0011		91	Jinhua	Zhejiang Province	0.0011
92	Tongling	Anhui Province	0.0008		92	Huizhou	Guangdong Province	0.0009		92	Taizhou	Jiangsu Province	0.001		92	Dongguan	Guangdong Province	0.0011		92	Ankang	Shaanxi Province	0.001
93	Taizhou	Zhejiang Province	0.0008		93	Haikou	Hainan Province	0.0009		93	Jiaozuo	Henan Province	0.0009		93	Nanchong	Sichuan Province	0.0011		93	Cangzhou	Hebei Province	0.001
94	Zhanjiang	Guangdong Province	0.0008		94	Tianjin	Tianjin	0.0009		94	Shenyang	Liaoning Province	0.0009		94	Jining	Shandong Province	0.001		94	Guilin	Guangxi Zhuang Autonomous Region	0.001
95	Cangzhou	Hebei Province	0.0007		95	Putian	Fujian Province	0.0009		95	Dongguan	Guangdong Province	0.0009		95	Haikou	Hainan Province	0.001		95	Haikou	Hainan Province	0.001
96	Tianjin	Tianjin	0.0007		96	Cangzhou	Hebei Province	0.0009		96	Shanxi Province	Taiyuan City	0.0009		96	Suzhou	Anhui Province	0.001		96	Jining	Shandong Province	0.001
97	Linyi	Shandong Province	0.0007		97	Taizhou	Jiangsu Province	0.0009		97	Haikou	Hainan Province	0.0009		97	Yuncheng	Shanxi Province	0.001		97	Shenyang	Liaoning Province	0.001
98	Yangzhou	Jiangsu Province	0.0007		98	Zhanjiang	Guangdong Province	0.0008		98	Yangzhou	Jiangsu Province	0.0009		98	Jiaozuo	Henan Province	0.001		98	Urumqi	Xinjiang Uygur Autonomous Region	0.0009
99	Wuxi	Jiangsu Province	0.0007		99	Beihai	Guangxi Zhuang Autonomous Region	0.0008		99	Putian	Fujian Province	0.0009		99	Shennongjia Forest Region	Hubei Province	0.001		99	Yuncheng	Shanxi Province	0.0009
100	Nanchong	Sichuan Province	0.0007		100	Dongguan	Guangdong Province	0.0008		100	Jinan	Shandong Province	0.0009		100	Huaihua	Hunan Province	0.001		100	Jiaozuo	Henan Province	0.0009

## Sheet: top cities
	No	Top Migration City in Guangdong to Wuhan	Percentage Range	Number of days listed in top 100 cities (Jan 18 to 22, 2020)
	1	Shenzhen	3.75-4.63%	5
	2	Guangzhou	2.03-2.6%	5
	3	Dongguan	1.28-1.5%	5
	4	Foshan	0.46-0.68%	5
	5	Huizhou	0.33-0.48%	5
	6	Zhuhai	0.27-0.37%	5
	7	Zhongshan	0.25-0.33%	5
	8	Jiangmen	0.09-0.12%	5
	9	Shantou	0.08-0.12%	3
	10	Qingyuan	0.0008	1
	11	Shaoguan	0.0007	1
	12	Zhanjiang	0.08-0.09%	2
	No	Top Destination City in Guangdong From Wuhan	Percentage Range	Number of days listed in top 100 cities (Jan 18 to 22, 2020)
	1	Shenzhen	0.35-0.43%	5
	2	Guangzhou	0.37-0.44%	5
	3	Huizhou	0.09-0.11%	2
	4	Dongguan	0.08-0.11%	5
	5	Zhuhai	0.09-0.11%	4
	6	Zhanjiang	0.0008	2
